# Supplementary material for: Assessing key decisions for transcriptomic data integration in biochemical networks
Source: PLOS journal article supplement (doi:10.1371/journal.pcbi.1007185), 2019-07-19
Supplement: S1 (10.1371/journal.pcbi.1007185.s001) [file journal.pcbi.1007185.s001]

(listing pending)
