# Supplementary material for: Assessing key decisions for transcriptomic data integration in biochemical networks
Source: PLoS Comput Biol. 2019 Jul 19;15(7):e1007185. doi: 10.1371/journal.pcbi.1007185 (PMC6668847; doi:10.1371/journal.pcbi.1007185)
Supplement: S1 Table — (XLSX) [file pcbi.1007185.s002.xlsx]

## Sheet: Sheet1
Tissues	Organ system
adipose tissue	Tissue
adrenal gland	Endocrine
appendix	Lymphatic system
bone marrow	Lymphatic system
brain	Nervous system
colon	Gastrointestinal
duodenum	Gastrointestinal
endometrium	Female Reproductive
esophagus	Gastrointestinal
fallopian tube	Female Reproductive
gallbladder	Hepato-biliary
heart muscle	Cardiovascular
kidney	Urinary System
liver	Hepato-biliary
lung	Respiratory
lymph node	Lymphatic system
ovary	Female Reproductive
pancreas	Pancreas
placenta	Female Reproductive
prostate	Male Reproductive
rectum	Gastrointestinal
salivary gland	Gastrointestinal
skeletal muscle	Musculoskeletal
skin	Skin
small intestine	Gastrointestinal
smooth muscle	Tissue
spleen	Lymphatic system
stomach	Gastrointestinal
testis	Male Reproductive
thyroid gland	Endocrine
tonsil	Lymphatic system
urinary bladder	Urinary System
